# Supplementary material for: Immunogenicity and efficacy of mRNA COVID-19 vaccine MRT5500 in preclinical animal models
Source: Springer Nature journal article supplement (doi:10.1038/s41541-021-00324-5), 2021-04-19
Supplement: 41541_2021_324_MOESM1_ESM.pdf [file 41541_2021_324_MOESM1_ESM.pdf]

1 **Supplementary Fig.1: Intracellular localization S antigen expressed in HeLa cells**  
2 **transformed with WT mRNA.** Cells transformed with WT mRNA were fixed, permeabilized  
3 and stained with antibodies for Spike protein (green) and KDEL (red), an endoplasmic reticulum  
4 marker. Samples were then examined using confocal microscopy. The left column represents an  
5 overlay of Spike protein and KDEL, while the right column shows the spike protein signal  
6 superimposed on a transmitted light channel.

7

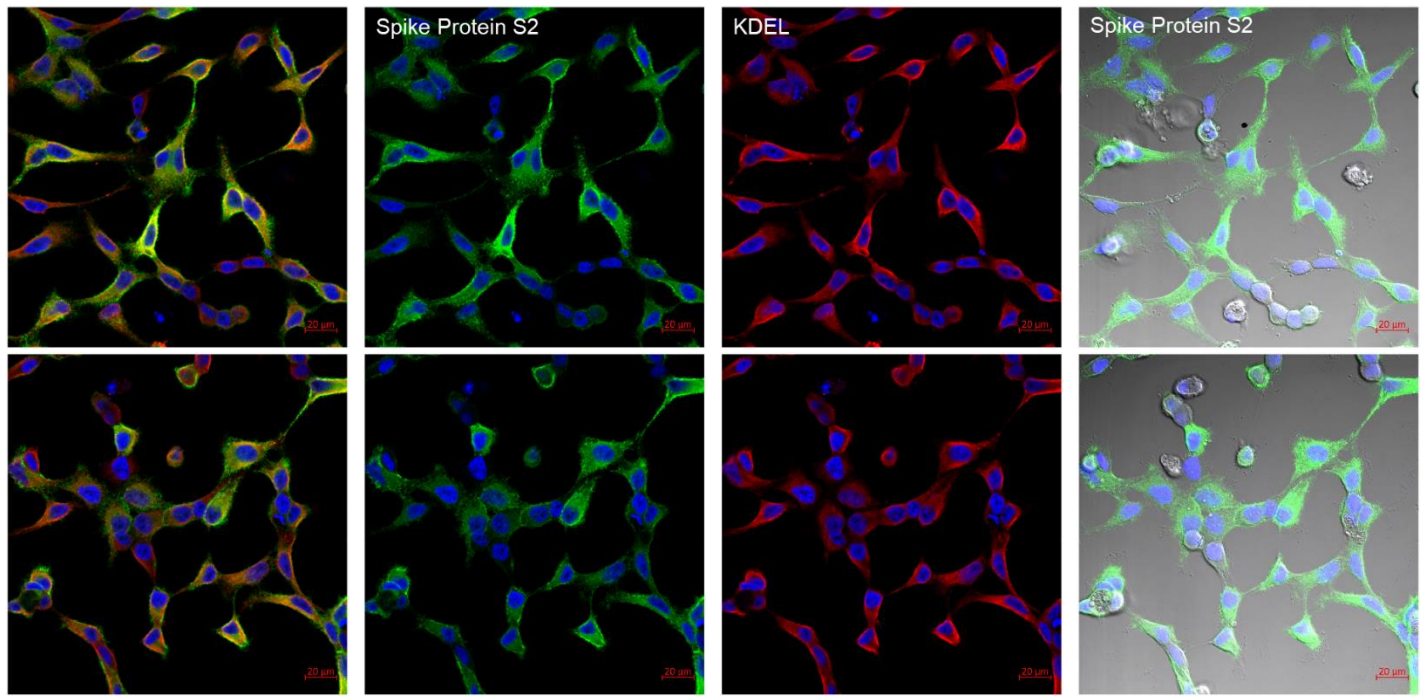

8

9

10 **Supplementary Fig. 2: Intracellular localization S antigen expressed in HeLa cells**  
11 **transformed with 2P mRNA.** Cells transformed with 2P mRNA were fixed, permeabilized and  
12 stained with antibodies for Spike protein (green) and KDEL (red), an endoplasmic reticulum  
13 marker. Samples were then examined using confocal microscopy. The left column represents an  
14 overlay of Spike protein and KDEL signals, while the right column shows the spike protein  
15 signal superimposed on a transmitted light channel.

16

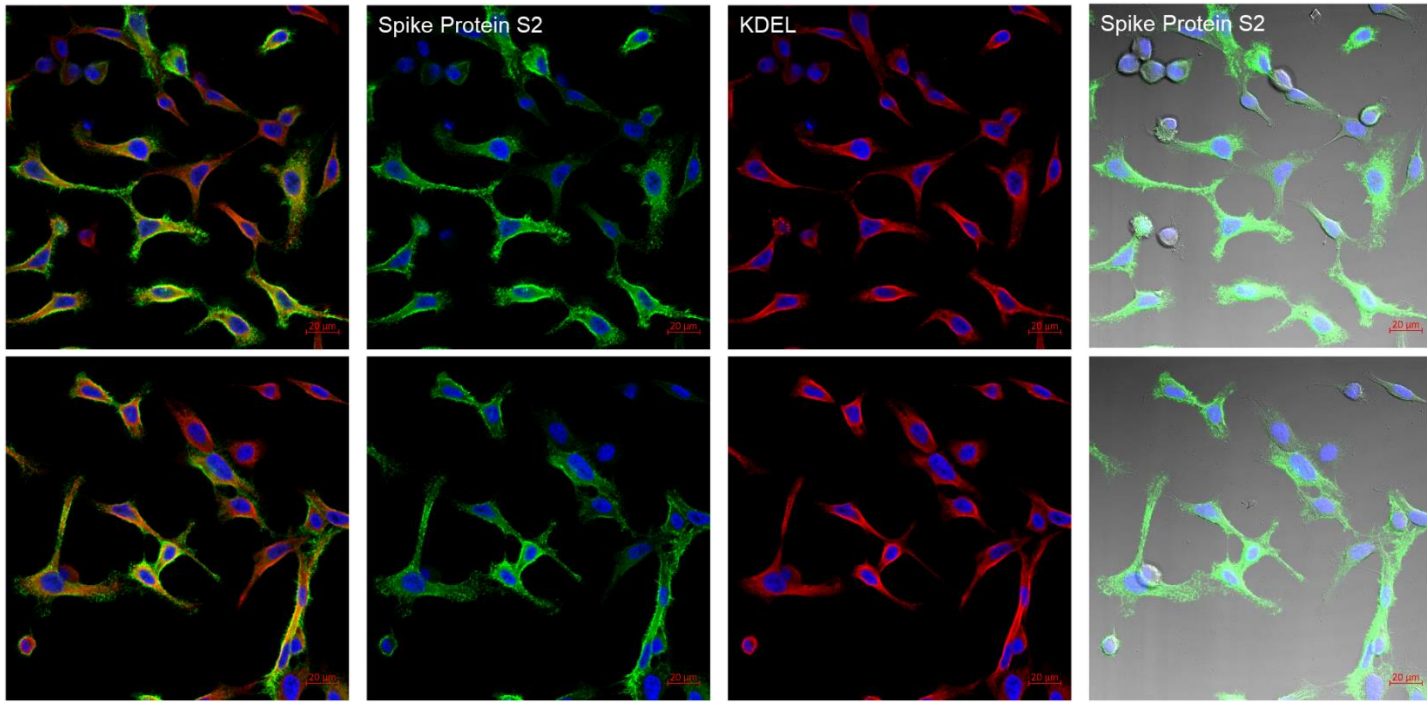

18

19 **Supplementary Figure 3: Intracellular localization S antigen expressed in HeLa cells**  
20 **transformed with GSAS mRNA.** Cells transformed with GSAS mRNA were fixed,  
21 permeabilized and stained with antibodies for Spike protein (green) and KDEL (red), an  
22 endoplasmic reticulum marker. Samples were then examined using confocal microscopy. The  
23 left column represents an overlay of Spike protein and KDEL signals, while the right column  
24 shows the spike protein signal superimposed on a transmitted light channel.

25

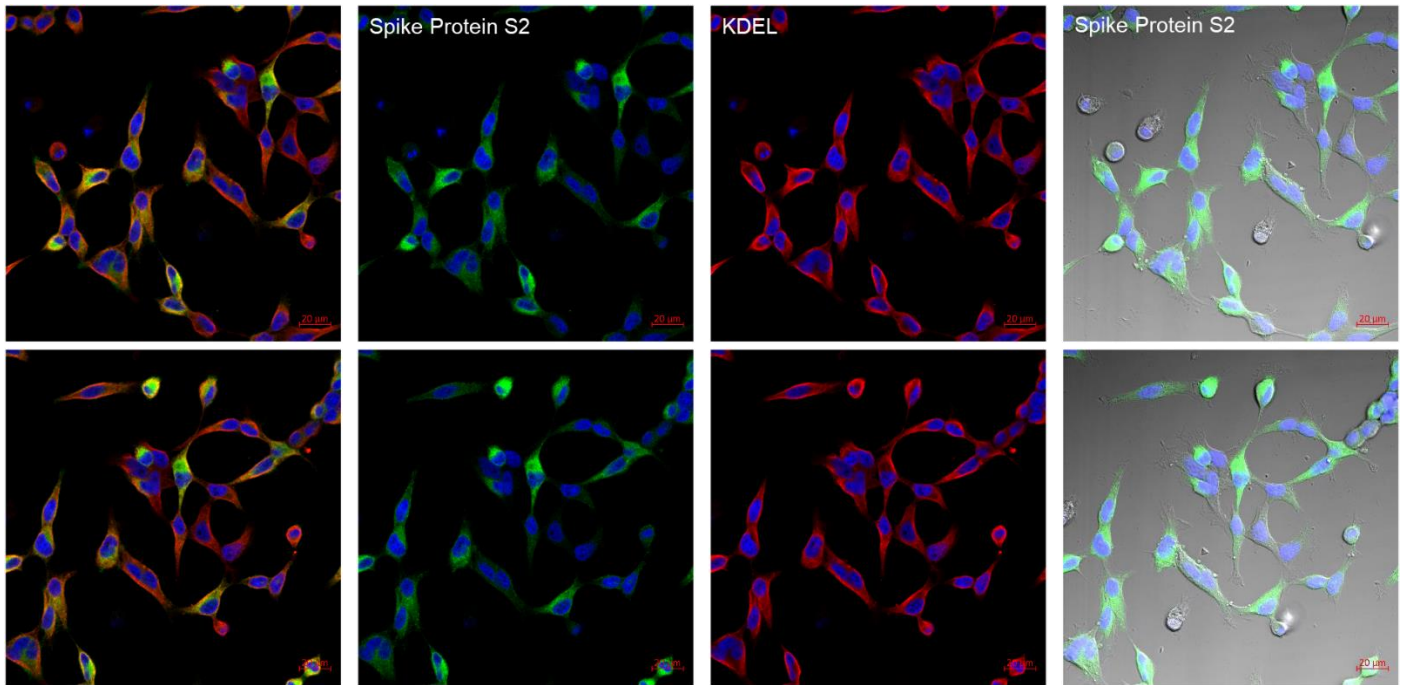

28 **Supplementary Fig. 4: Intracellular localization S antigen expressed in HeLa cells**  
29 **transformed with 2P/GSAS mRNA.** Cells transformed with 2P/GSAS mRNA were fixed,  
30 permeabilized and stained with antibodies for Spike protein (green) and KDEL (red), an  
31 endoplasmic reticulum marker. Samples were then examined using confocal microscopy. The  
32 left column represents an overlay of Spike protein and KDEL signals, while the right column  
33 shows the spike protein signal superimposed on a transmitted light channel.

34

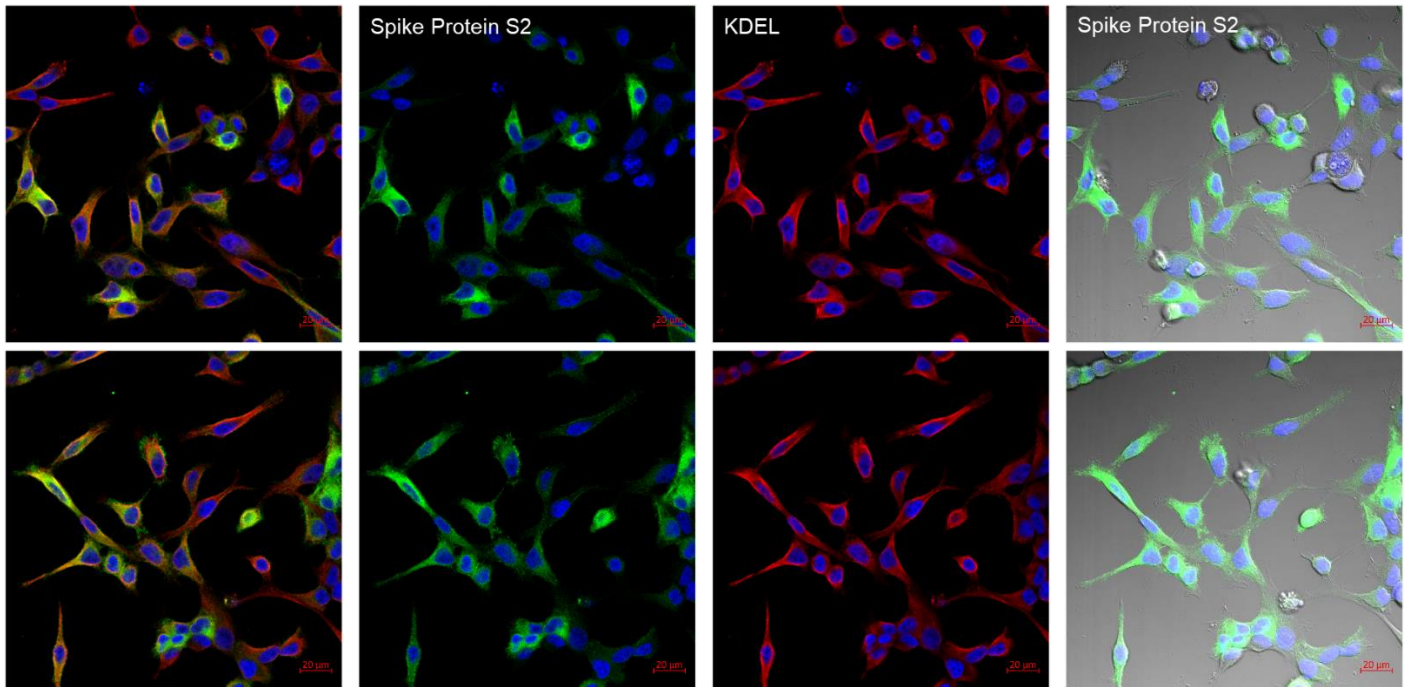

35

36



37 **Supplementary Fig. 5: Intracellular localization S antigen expressed in HeLa cells**  
38 **transformed with 2P/GSAS/ALAYT mRNA.** Cells transformed with 2P/GSAS/ALAYT  
39 mRNA were fixed, permeabilized and stained with antibodies for Spike protein (green) and  
40 KDEL (red), an endoplasmic reticulum marker. Samples were then examined using confocal  
41 microscopy. The left column represents an overlay of Spike protein and KDEL signals, while the  
42 right column shows the spike protein signal along superimposed on a transmitted light channel.

43

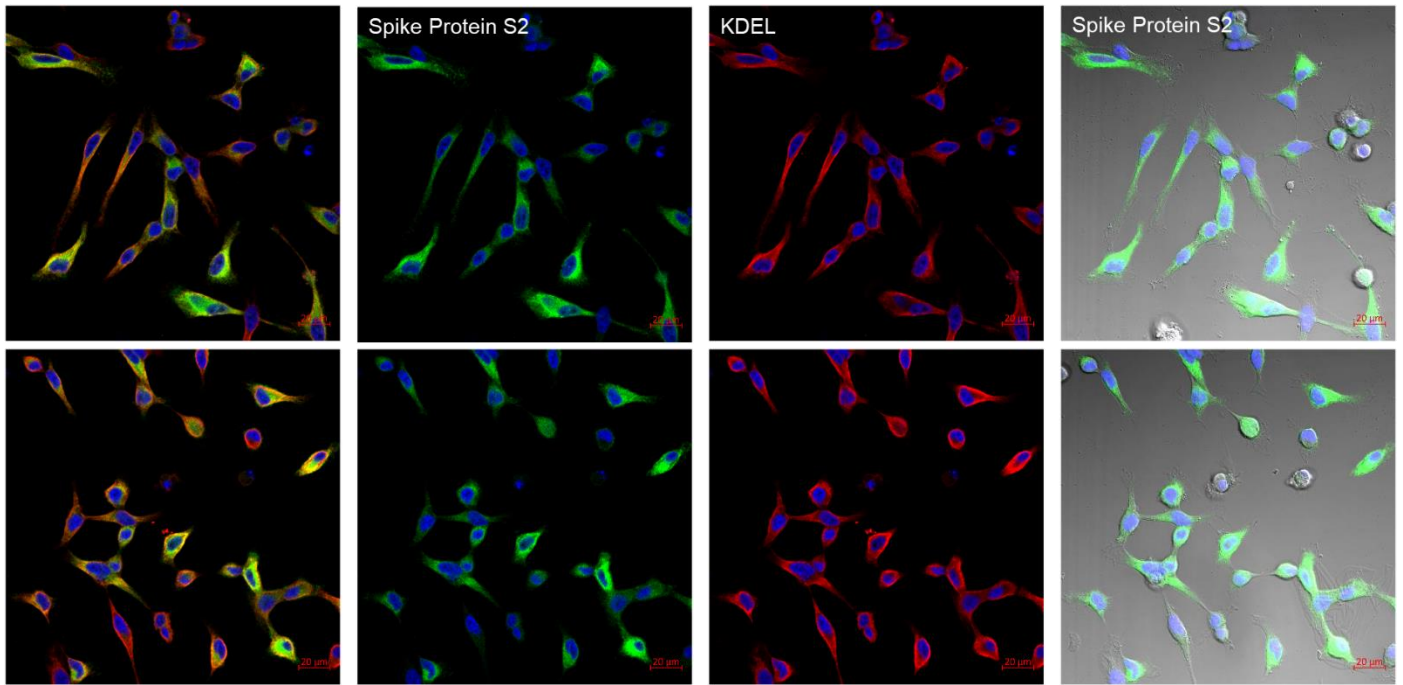

45

46 **Supplementary Fig. 6: Intracellular localization S antigen expressed in HeLa cells**  
47 **transformed with 6P mRNA** Cells transformed with 6P mRNA were fixed, permeabilized and  
48 stained with antibodies for Spike protein (green) and KDEL (red), an endoplasmic reticulum  
49 marker. Samples were then examined using confocal microscopy. The left column represents an  
50 overlay of Spike protein and KDEL signals, while the right column shows the spike protein  
51 signal superimposed on a transmitted light channel.

52

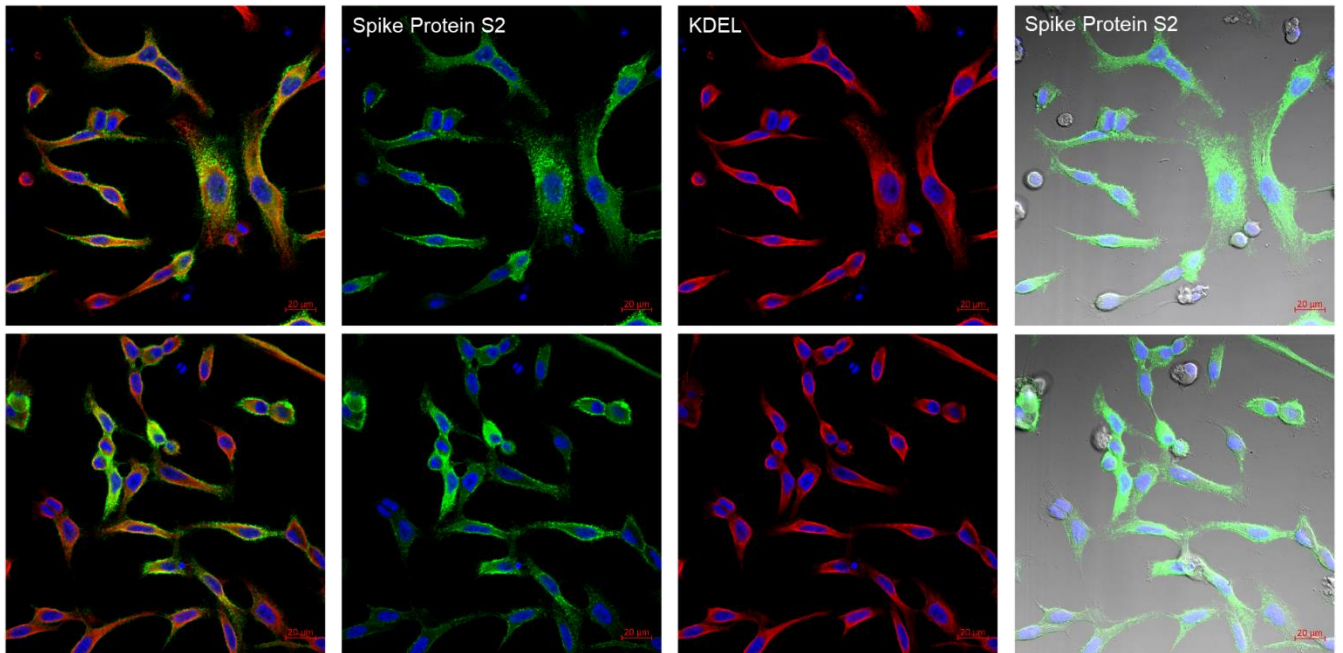

54

55 **Supplementary Fig. 7: Intracellular localization S antigens expressed in HeLa cells**  
56 **transformed with 6P/GSAS mRNA.** Cells transformed with 6P/GSAS mRNA were fixed,  
57 permeabilized and stained with antibodies for Spike protein (green) and KDEL (red), an  
58 endoplasmic reticulum marker. Samples were then examined using confocal microscopy. The  
59 left column represents an overlay of Spike protein and KDEL signals, while the right column  
60 shows the spike protein signal superimposed on a transmitted light channel.

61

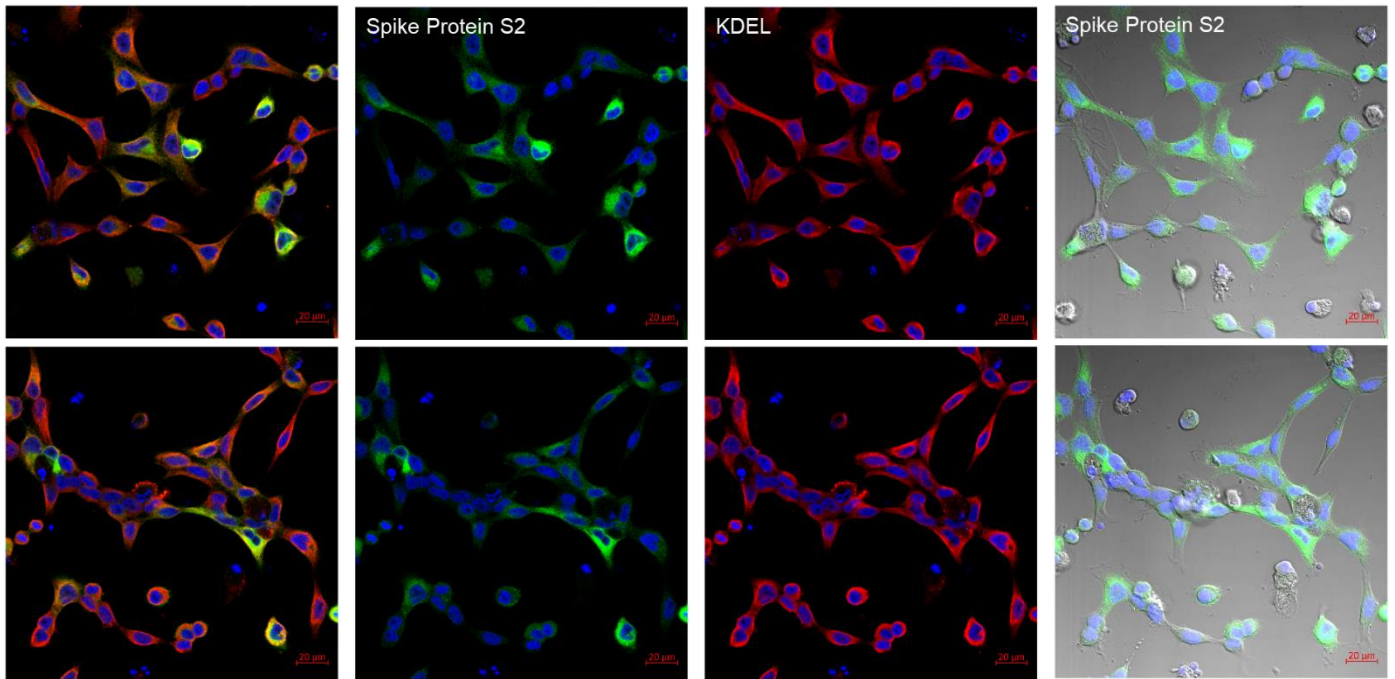

62

63

64 **Supplementary Fig. 8: Relative degree (score) of surface localization of S-proteins based on**  
65 **visual inspection of HeLa cells transformed with mRNAs.**

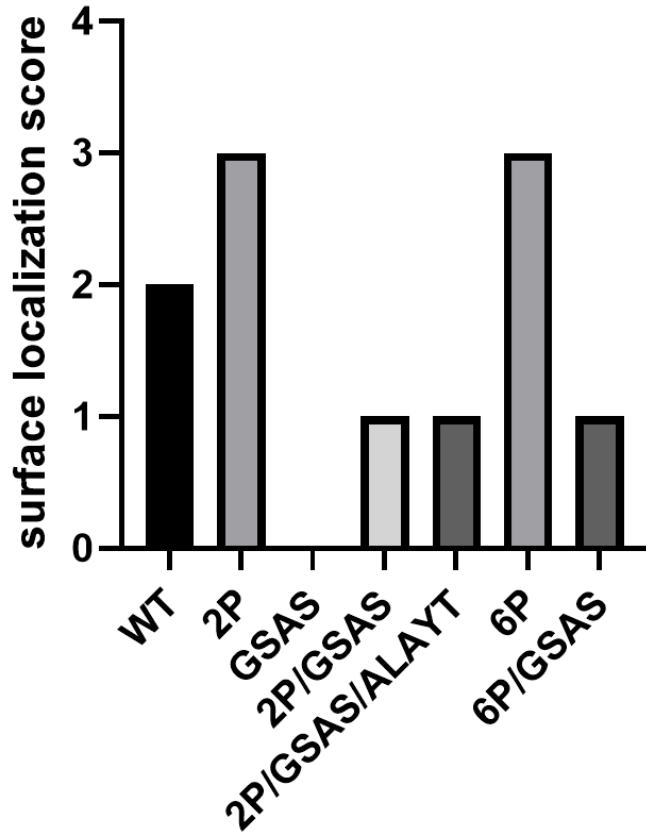

66

67



68 **Supplementary Fig.9 Comparison of antibody binding responses against S antigen**  
69 **formulations in mice and NHPs.** Serum binding antibody titers in mice (a) and NHPs (b)  
70 immunized with mRNA vaccines WT, 2P, GSAS, 2P/GSAS, 2P/GSAS/ALAYT, 6P, and  
71 6P/GSAS. Briefly, BALB/c female mice (n=8) or Cynomolgus monkeys (n=4) were immunized  
72 twice three weeks apart with 0.4 µg or 5 µg of mRNA vaccines formulations respectively. 2P,  
73 GSAS and GSAS/2P (MRT5500) were tested in both animal models, while WT was tested only  
74 in mice.  
75 Sera samples from pre-immunized animals (Pre-; D-4) as well as samples collected on D14, 21,  
76 28, 35, 42 (NHP only) were tested for reactivity to recombinant S protein in ELISA or tested in a  
77 pseudovirus neutralization assay (Fig. 2). Each dot represents an individual serum sample, and  
78 the line represents the geometric mean for the group. the dotted line below for each panel  
79 represents the lower limit of assay readout..

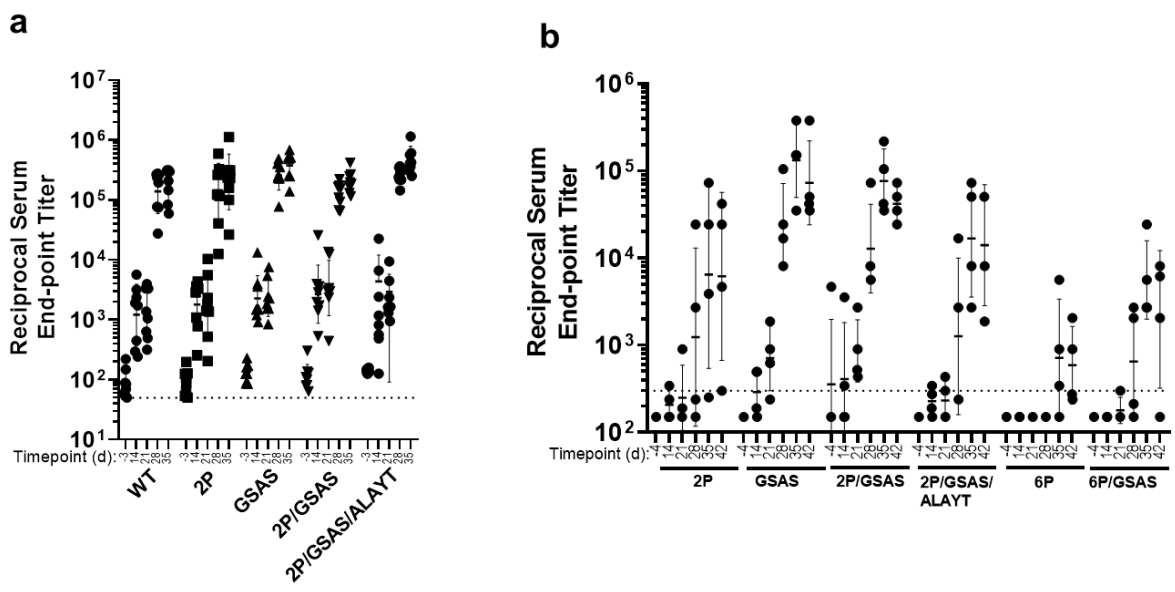

80

81

82 **Supplementary Fig.10: MRT5500 induces TH1-biased T-cell responses in mice.** (a) IFN $\gamma$   
83 and (b) IL-5 ELISPOT D35 data for the 5 and 10  $\mu$ g doses. Following re-stimulation with S-  
84 protein peptides, pooled splenocytes MRT5500-immunized mouse groups secreted  
85 predominantly IFN $\gamma$  (TH1) whereas IL-5 (TH2) secretion was marginal.

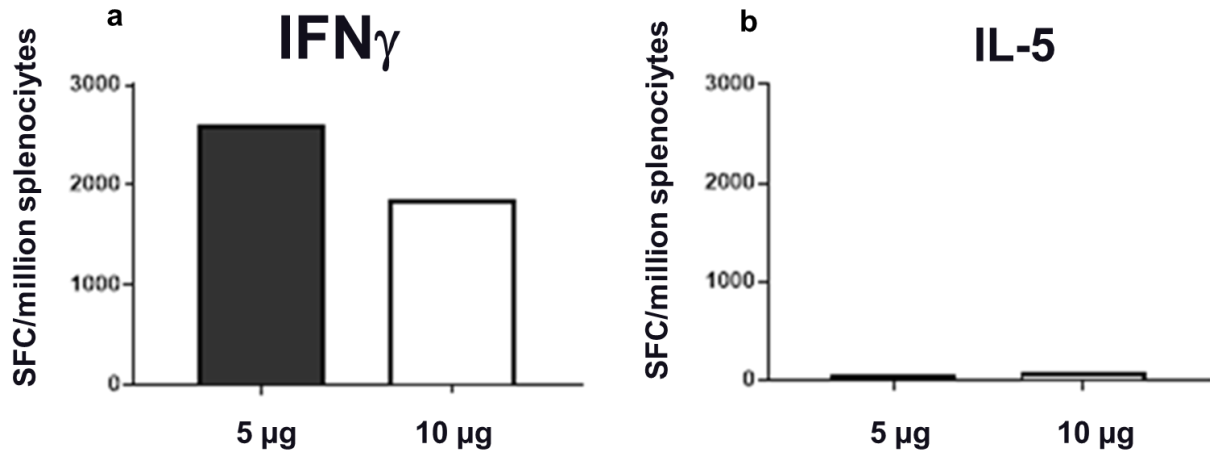

86

87

88 **Supplementary Fig.11: MRT5500 elicited strong anti-spike antibody binding response in**  
 89 **NHPs.** Briefly, Nunc MaxiSorb plates were coated with SARS-CoV S-GCN4 protein (custom  
 90 made at GeneArt) at 0.5  $\mu\text{g}/\text{mL}$  in PBS overnight at 4°C. Plates were washed 3 times with PBS-  
 91 Tween 0.1% before blocking with 1% BSA in PBS-Tween 0.1% for 1 h at ambient temperature.  
 92 Samples were plated with 1:450 initial dilution followed by 3-fold, 7-point serial dilution in  
 93 blocking buffer. Plates were washed 3 times after 1 h incubation at room temperature before  
 94 adding 50  $\mu\text{L}$  of 1:5000 Rabbit anti-human IgG (Jackson Immuno Research) to each well. Plates  
 95 were incubated at room temperature for 1hr and washed 3x. Plates were developed using Pierce  
 96 1-Step Ultra TMB-ELISA Substrate Solution for 0.1 h and stopped by TMB stop solution. Plates  
 97 were read at 450 nm in SpectraMax plate reader. Antibody titers were reported as the highest  
 98 dilution that is  $\geq 0.2$  Optical Density (OD) cutoff.

99

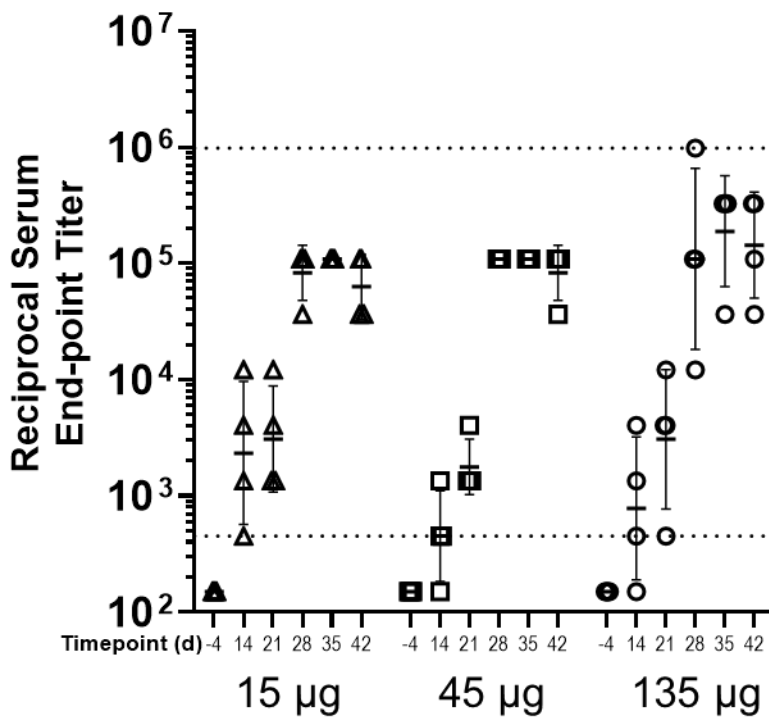

100

101 **Supplementary Fig. 12: Strong correlations between individual NHP ELISA, PsV and MN**  
 102 **time-point titers (see also Supplementary Table 2).** Top panel A: 4 subjects in 15  $\mu$ g dose;  
 103 Middle panel B: 4 subjects in 45  $\mu$ g dose; Bottom panel C: 4 subjects in 135  $\mu$ g dose.

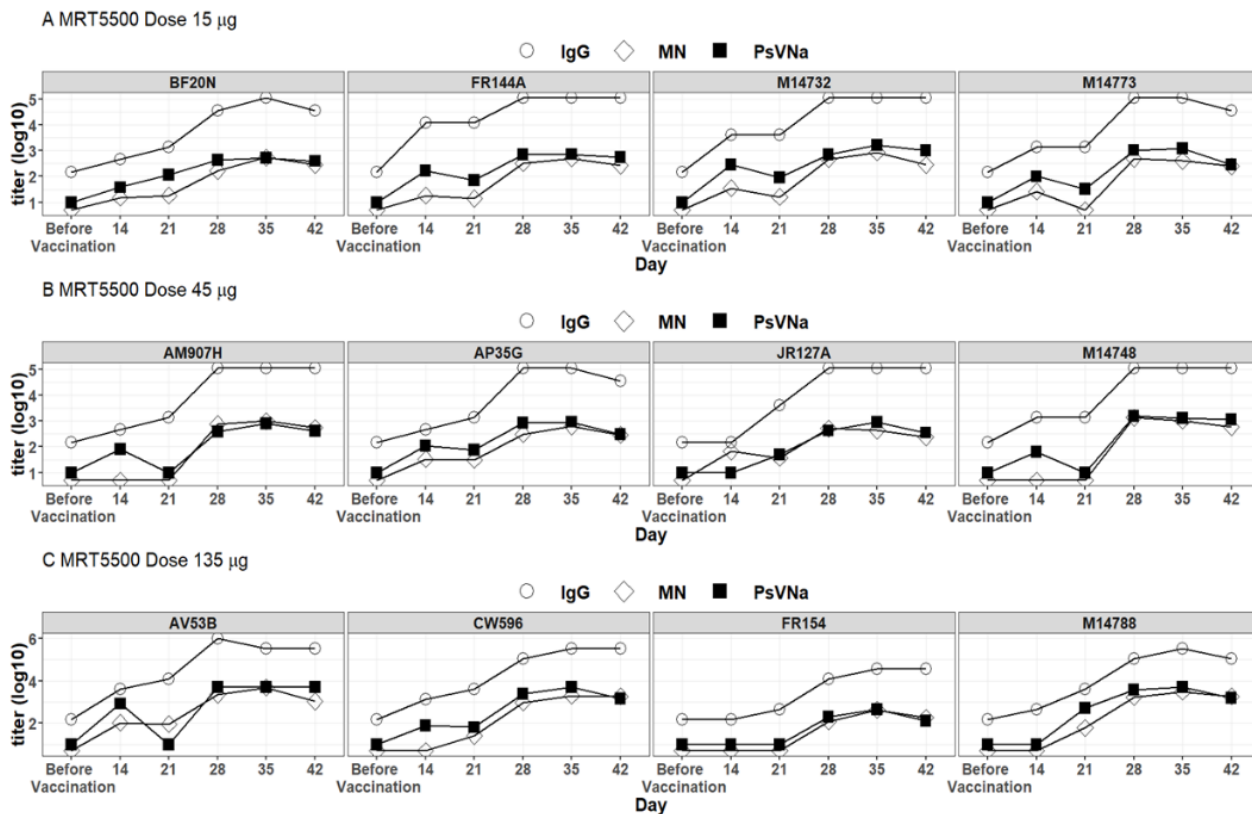

104

105

106

107 **Supplementary Fig. 13: PsV titers in mice for the 1 µg, 5 µg and 10 µg dose levels of**  
 108 **MRT5500 were significantly different from the Human Convalescent sera PsV titers**

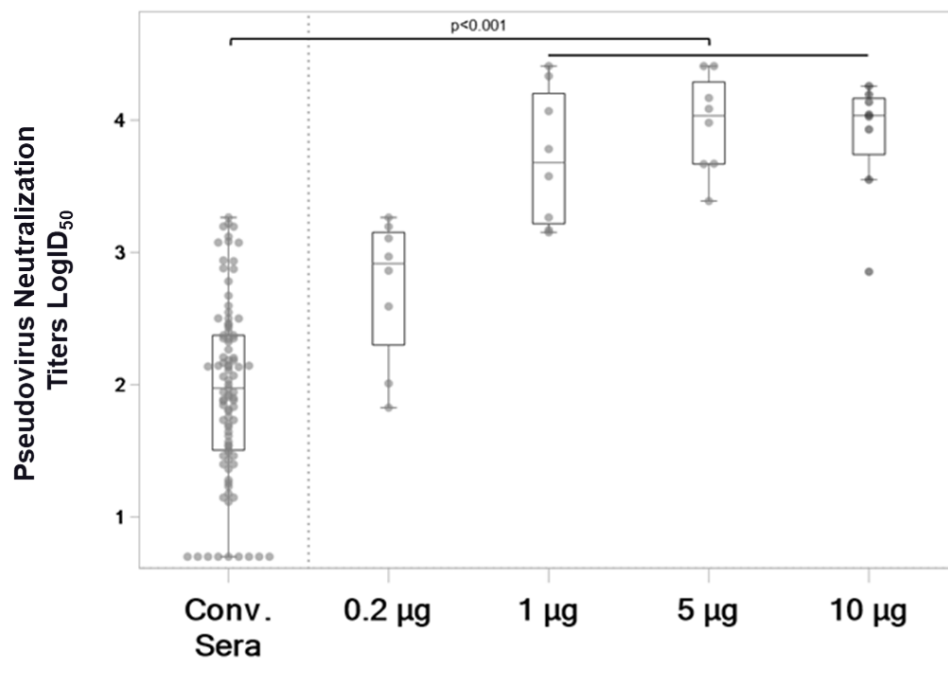

109  
 110 **Supplementary Fig. 14: Comparison of D35 MRT5500 titers to human convalescent sera**  
 111 **PsV titers in NHPs for the 15 µg, 45 µg and 135 µg dose levels of MRT5500 were**  
 112 **significantly different from the Human Convalescent sera PsV titers.**

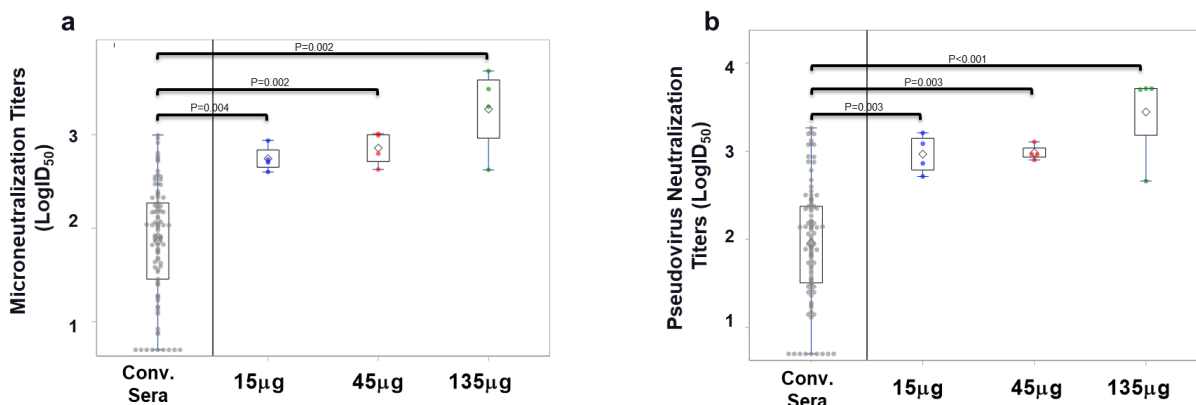

113  
 114



115 **Supplementary Fig. 15: Protective efficacy of MRT5500 in hamster disease model.** Low  
116 magnification representative photomicrographs (H&E) of lungs from hamsters receiving one or  
117 two doses of MRT5500 at increasing doses. In Sham (placebo) animals, more than 50% of the  
118 lung parenchyma is disrupted by marked inflammatory cell infiltrate, type II pneumocyte  
119 hyperplasia, multifocal hemorrhage, syncytial cells and cellular debris in hamsters treated once  
120 with the lowest dose represented by multifocal dark purple regions (arrows). Note, substantially  
121 reduced affected areas in lungs of hamsters receiving two doses and increasing doses. More than  
122 50% of the lung parenchyma is disrupted in placebo treated mice as compared to naïve hamsters.  
123 Briefly, animals were immunized on D0, 21 with 0.15 µg, 1.5 µg, 4.5 µg, or 13.5 µg of  
124 MRT5500 and challenged on D42 with  $10^6$  pfu of SARS-CoV-2 intranasally (IN). Weight of

125 animals was monitored on daily basis.

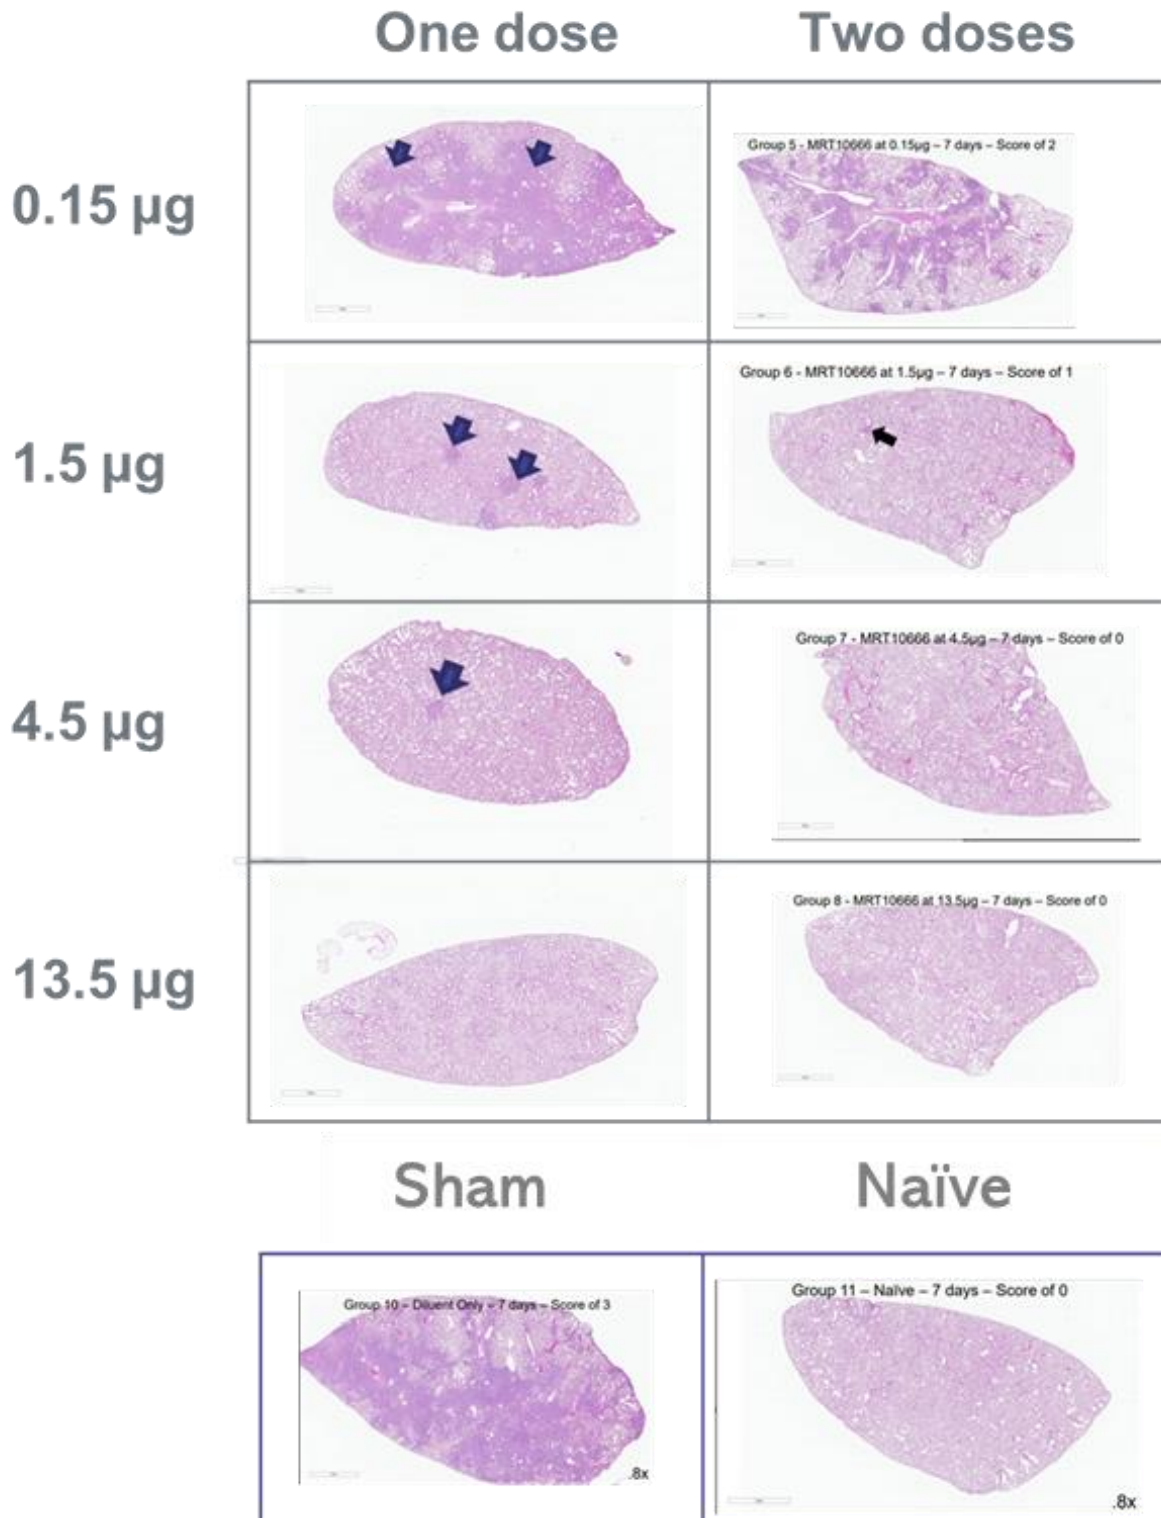

126

127 **Supplementary Fig. 15 (see legend page 14)**

128 **Supplementary Fig.16: Pre-challenge MRT5500 neutralizing and ELISA titers in hamsters.**

129 Plaque reduction neutralization (PRNT<sub>50</sub>; **a**) and ELISA (**b**) titers in sera of MRT5500  
130 vaccinated animals collected on D35 (one dose regimen) or D42 (two dose regimen). Briefly,  
131 hamsters were immunized either on D0 (one dose immunization) or D0, 21 (two doses  
132 immunizations) with 0.15  $\mu\text{g}$ , 1.5  $\mu\text{g}$ , 4.5  $\mu\text{g}$ , or 13.5  $\mu\text{g}$  of MRT5500 and challenged on D49  
133 with  $10^4$  pfu of SARS-CoV-2 intranasally (IN).

134

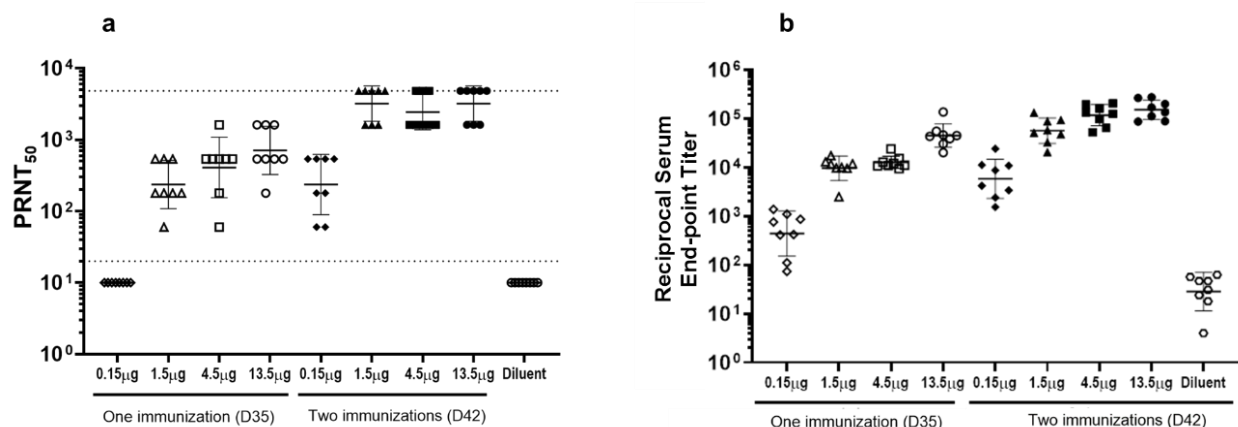

135

136

137 **Supplementary Fig. 17: Example of D7 post challenge histopathology findings in lungs of**  
138 **hamsters.** Representative photomicrographs (H&E) of lungs from a SARS-CoV-2 inoculated  
139 and placebo-treated hamster (a-c) and a naïve hamster (d-f). Normal lung parenchyma is  
140 disrupted by marked inflammatory cell infiltrate, type II pneumocyte hyperplasia, multifocal  
141 hemorrhage, syncytial cells, and cellular debris in infected hamster lung (b) as compared to  
142 normal parenchyma in naïve hamster lung (e). Bronchiolar epithelium (arrows) is markedly  
143 hyperplastic in infected lung sample (c) and histologically unremarkable in the naïve lung (f).

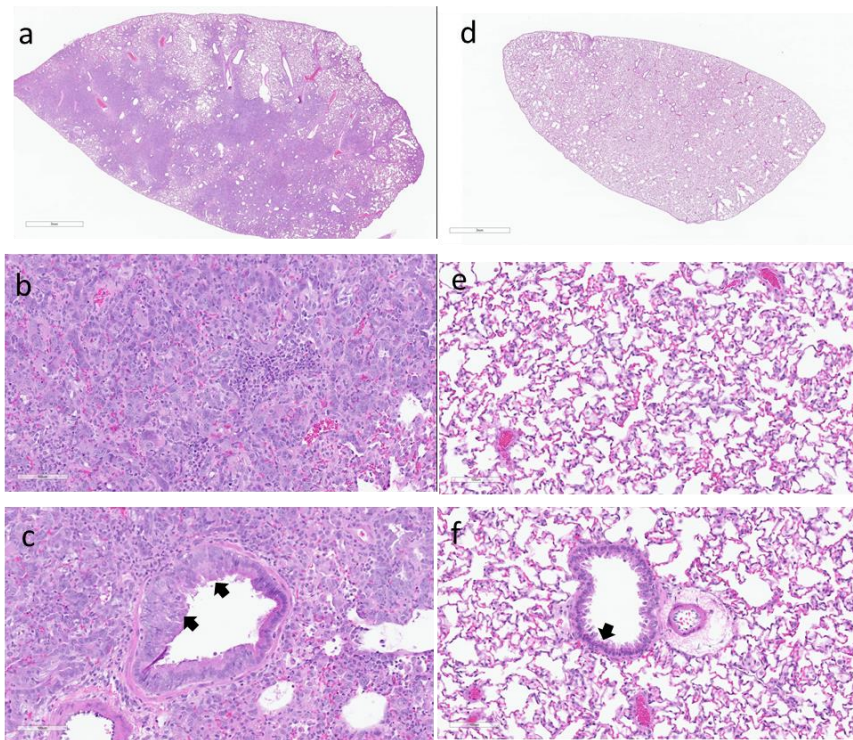

144  
145  
146

147 **Supplementary Fig.18: Example of D7 post challenge histopathology in lungs of hamsters**  
148 **receiving one dose or two doses at 1.5 µg MRT5500.** Representative lung photomicrographs  
149 (H&E). (a) Multiple foci of inflammatory cell infiltrate, type II pneumocyte hyperplasia,  
150 syncytial cells and cellular debris (arrows) are present in a hamster treated with a single 1.5 µg  
151 dose. (c) Higher magnification of boxed area in image a. Lung sections from a hamster treated  
152 with two 1.5 µg doses (b and d) appear histologically unremarkable.

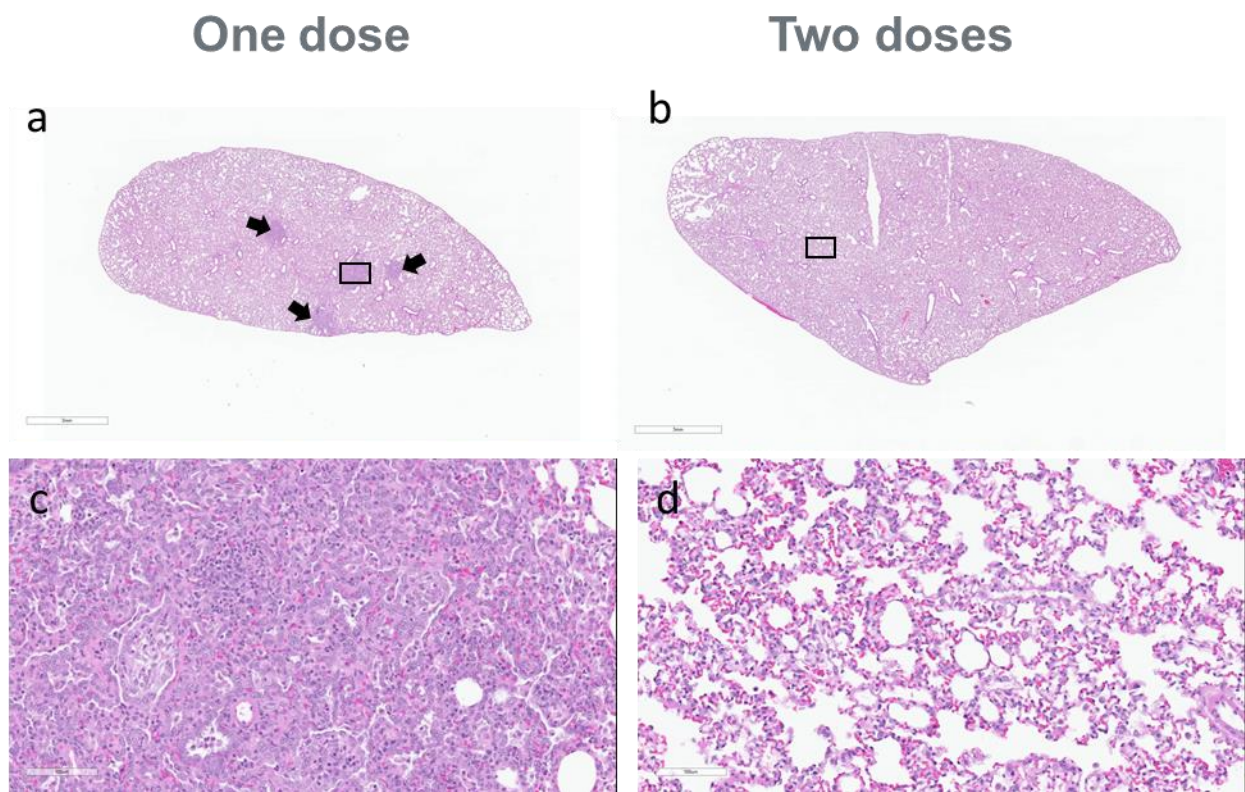

153  
154  
155



156 **Supplementary Fig.19: Hamster challenge study. Individual weight loss by groups**

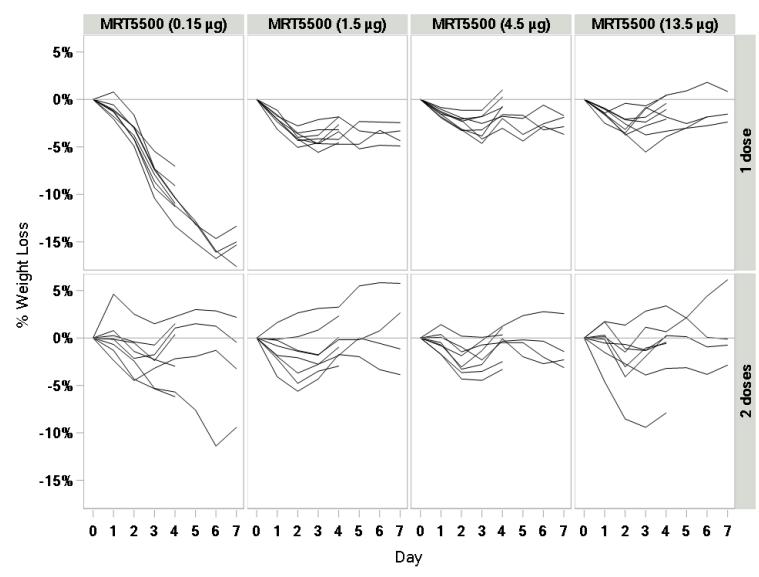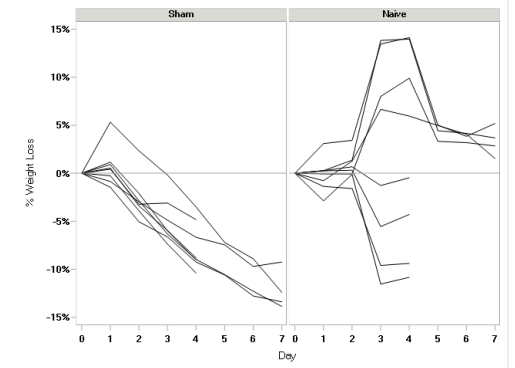

157

158

159

160 **Supplementary Table 1: Pairwise dose comparison in PsV neutralization titers on D35 in**  
 161 **mice.** There were no statistically significant differences in PsV titers among the 1 µg, 5 µg and  
 162 10 µg dose levels, while at the lowest dose level (0.2 µg) PsV titers were significantly different  
 163 from those obtained with the higher dose levels.

| Pairwise dose comparisons<br>PsVNa titers on D35 in mice | Fold Difference<br>(95% CI) | p-value  |
|----------------------------------------------------------|-----------------------------|----------|
| 0.2 µg vs. 1 µg                                          | /9.8 (4.4, 21.7)*           | p<0.0001 |
| 0.2 µg vs. 5 µg                                          | /17.6 (7.9, 38.9)           | p<0.0001 |
| 0.2 µg vs. 10 µg                                         | /14.0 (6.3, 31.0)           | p<0.0001 |
| 1 µg vs. 5 µg                                            | /1.8 (0.8, 4.0)             | p=0.1490 |
| 1 µg vs. 10 µg                                           | /1.4 (0.6, 3.2)             | p=0.3761 |
| 5 µg vs. 10 µg                                           | x1.3 (0.6, 2.8)**           | p=0.5734 |

Comparison: Group1 versus Group2

\* /X.X: Group1 is X.X-fold lower than group2

\*\* xX.X: Group1 is X.X-fold higher than group2

164

165

166 **Supplementary Table 2: Spearman Correlation Coefficients (SCC) between ELISA (IgG),**  
 167 **Pseudoviral (PsV) and Microneutralization (MN) titers.** SCC were conducted per individual  
 168 animals (Suppl. Fig.4) and Means (95% CI) were calculated per dose (N=4) or all NHPs (N=12)

|        |    | Spearman Correlation Coefficient* |                   |                   |
|--------|----|-----------------------------------|-------------------|-------------------|
| Dose   | N  | ELISA and MN                      | ELISA and PsV     | MN and PsV        |
| 15 µg  | 4  | 0.94 (0.90, 0.99)                 | 0.95 (0.90, 1.00) | 0.95 (0.90, 1.00) |
| 45 µg  | 4  | 0.88 (0.82, 0.94)                 | 0.90 (0.82, 0.97) | 0.92 (0.81, 1.00) |
| 135 µg | 4  | 0.93 (0.83, 1.00)                 | 0.88 (0.77, 0.98) | 0.91 (0.84, 0.99) |
| Total  | 12 | 0.92 (0.89, 0.95)                 | 0.91 (0.87, 0.94) | 0.93 (0.90, 0.96) |

\* Mean (95% CI)

169

170 **Supplementary Table 3: Hamster challenge data (1 dose regimen). Descriptive weight data**  
 171 **analysis during 7 DPI**

|               |                | 1<br>Group          |                     |                     |                     |
|---------------|----------------|---------------------|---------------------|---------------------|---------------------|
|               |                | MRT5500 (0.15 µg)   | MRT5500 (1.5 µg)    | MRT5500 (4.5 µg)    | MRT5500 (13.5 µg)   |
| Weight D0 (g) | N              | 8                   | 8                   | 8                   | 8                   |
|               | NMiss          | 0                   | 0                   | 0                   | 0                   |
|               | Mean (SD)      | 142.8 (±18.6)       | 150.3 (±15.3)       | 149.7 (±10.5)       | 148.9 (±10.7)       |
|               | Min;Max        | 115.3;175.0         | 132.6;177.7         | 134.5;165.9         | 129.6;160.5         |
|               | Median [Q1;Q3] | 141.9 [131.2;153.0] | 146.6 [138.3;161.2] | 150.7 [140.9;157.1] | 151.3 [141.9;157.2] |
| Weight D1 (g) | N              | 8                   | 8                   | 8                   | 8                   |
|               | NMiss          | 0                   | 0                   | 0                   | 0                   |
|               | Mean (SD)      | 141.2 (±18.1)       | 147.2 (±14.7)       | 147.5 (±10.0)       | 146.7 (±10.5)       |
|               | Min;Max        | 116.2;172.9         | 129.8;173.5         | 133.1;163.3         | 127.6;157.9         |
|               | Median [Q1;Q3] | 140.2 [129.0;151.2] | 143.1 [136.3;157.8] | 148.2 [139.4;154.4] | 148.4 [140.2;155.5] |
| Weight D2 (g) | N              | 8                   | 8                   | 8                   | 8                   |
|               | NMiss          | 0                   | 0                   | 0                   | 0                   |
|               | Mean (SD)      | 137.9 (±18.2)       | 144.3 (±14.3)       | 146.1 (±9.5)        | 144.9 (±10.4)       |
|               | Min;Max        | 113.4;169.9         | 127.8;170.3         | 131.9;160.7         | 125.5;155.4         |
|               | Median [Q1;Q3] | 137.1 [125.2;147.6] | 140.3 [133.6;154.3] | 146.5 [138.5;152.9] | 148.4 [137.8;153.0] |
| Weight D3 (g) | N              | 8                   | 8                   | 8                   | 8                   |
|               | NMiss          | 0                   | 0                   | 0                   | 0                   |
|               | Mean (SD)      | 131.5 (±18.3)       | 144.1 (±13.6)       | 145.3 (±9.6)        | 145.3 (±9.3)        |
|               | Min;Max        | 106.9;162.2         | 126.4;167.8         | 131.1;159.5         | 128.5;155.0         |
|               | Median [Q1;Q3] | 131.0 [118.3;142.3] | 140.9 [134.2;154.1] | 147.0 [137.1;152.0] | 147.9 [138.6;152.9] |
| Weight D4 (g) | N              | 8                   | 8                   | 8                   | 8                   |
|               | NMiss          | 0                   | 0                   | 0                   | 0                   |
|               | Mean (SD)      | 128.1 (±18.5)       | 145.2 (±13.4)       | 148.1 (±10.7)       | 146.6 (±10.3)       |
|               | Min;Max        | 103.4;159.1         | 128.1;169.6         | 132.1;164.7         | 127.2;157.1         |
|               | Median [Q1;Q3] | 126.8 [115.1;139.2] | 142.3 [135.7;154.0] | 149.7 [139.4;154.8] | 149.0 [140.1;155.3] |
| Weight D5 (g) | N              | 4                   | 4                   | 4                   | 4                   |
|               | NMiss          | 4                   | 4                   | 4                   | 4                   |
|               | Mean (SD)      | 113.8 (±12.5)       | 142.1 (±15.6)       | 142.0 (±10.3)       | 147.4 (±14.3)       |
|               | Min;Max        | 100.1;127.5         | 125.7;155.5         | 131.8;153.8         | 126.3;157.0         |
|               | Median [Q1;Q3] | 113.9 [103.5;124.2] | 143.6 [128.7;155.5] | 141.2 [133.5;150.5] | 153.2 [138.5;156.4] |
| Weight D6 (g) | N              | 4                   | 4                   | 4                   | 4                   |
|               | NMiss          | 4                   | 4                   | 4                   | 4                   |
|               | Mean (SD)      | 110.7 (±11.1)       | 142.7 (±16.2)       | 142.9 (±9.7)        | 148.6 (±14.6)       |
|               | Min;Max        | 98.4;123.0          | 126.2;157.8         | 133.7;155.6         | 127.2;158.4         |
|               | Median [Q1;Q3] | 110.7 [101.6;119.8] | 143.4 [128.8;156.6] | 141.2 [135.6;150.3] | 154.3 [139.1;158.0] |
| Weight D7 (g) | N              | 4                   | 4                   | 4                   | 3                   |
|               | NMiss          | 4                   | 4                   | 4                   | 5                   |
|               | Mean (SD)      | 111.3 (±10.6)       | 142.3 (±15.6)       | 142.6 (±10.9)       | 145.4 (±15.6)       |
|               | Min;Max        | 99.9;124.6          | 126.1;156.0         | 132.2;156.7         | 127.6;156.9         |
|               | Median [Q1;Q3] | 110.4 [103.3;119.4] | 143.5 [128.9;155.7] | 140.8 [134.2;151.1] | 151.6 [127.6;156.9] |

173 **Supplementary Table 4. Hamster challenge data (2 dose regimen). Descriptive weight data**  
 174 **analysis during 7 DPI**

|               |                | 2<br>Group          |                     |                     |                     |
|---------------|----------------|---------------------|---------------------|---------------------|---------------------|
|               |                | MRT5500 (0.15 µg)   | MRT5500 (1.5 µg)    | MRT5500 (4.5 µg)    | MRT5500 (13.5 µg)   |
| Weight D0 (g) | N              | 8                   | 8                   | 8                   | 8                   |
|               | NMiss          | 0                   | 0                   | 0                   | 0                   |
|               | Mean (SD)      | 146.2 (±17.0)       | 152.9 (±13.0)       | 149.0 (±14.3)       | 158.6 (±9.3)        |
|               | Min;Max        | 120.7;169.3         | 131.8;173.3         | 121.5;163.7         | 143.4;170.9         |
|               | Median [Q1;Q3] | 144.2 [134.9;160.8] | 152.1 [145.3;161.8] | 151.4 [141.6;160.2] | 158.8 [153.0;165.4] |
| Weight D1 (g) | N              | 8                   | 8                   | 8                   | 8                   |
|               | NMiss          | 0                   | 0                   | 0                   | 0                   |
|               | Mean (SD)      | 146.3 (±16.1)       | 151.1 (±13.5)       | 148.3 (±14.7)       | 158.0 (±10.8)       |
|               | Min;Max        | 121.0;165.9         | 126.4;170.1         | 120.9;163.9         | 141.2;171.4         |
|               | Median [Q1;Q3] | 147.7 [134.4;159.7] | 152.8 [143.4;160.0] | 150.1 [139.8;160.9] | 160.1 [148.9;166.9] |
| Weight D2 (g) | N              | 8                   | 8                   | 8                   | 8                   |
|               | NMiss          | 0                   | 0                   | 0                   | 0                   |
|               | Mean (SD)      | 143.6 (±14.9)       | 149.9 (±13.9)       | 145.6 (±14.8)       | 154.5 (±10.3)       |
|               | Min;Max        | 120.2;161.7         | 124.4;169.7         | 117.5;160.9         | 139.5;165.7         |
|               | Median [Q1;Q3] | 144.6 [133.0;155.9] | 153.8 [141.1;157.7] | 147.9 [137.3;158.1] | 154.7 [145.7;165.2] |
| Weight D3 (g) | N              | 8                   | 8                   | 8                   | 8                   |
|               | NMiss          | 0                   | 0                   | 0                   | 0                   |
|               | Mean (SD)      | 142.6 (±15.9)       | 150.4 (±13.3)       | 146.2 (±15.2)       | 155.7 (±12.5)       |
|               | Min;Max        | 119.8;163.9         | 126.1;168.5         | 118.1;162.1         | 137.8;169.9         |
|               | Median [Q1;Q3] | 143.7 [129.8;154.9] | 154.2 [141.8;158.6] | 147.3 [138.0;159.4] | 156.2 [144.6;168.2] |
| Weight D4 (g) | N              | 8                   | 8                   | 8                   | 8                   |
|               | NMiss          | 0                   | 0                   | 0                   | 0                   |
|               | Mean (SD)      | 143.9 (±15.8)       | 152.5 (±13.1)       | 148.2 (±14.8)       | 157.1 (±11.9)       |
|               | Min;Max        | 122.5;165.6         | 129.5;170.1         | 121.4;165.5         | 138.8;169.9         |
|               | Median [Q1;Q3] | 144.6 [130.6;156.4] | 155.5 [143.5;161.2] | 149.2 [140.2;160.1] | 158.7 [146.8;168.7] |
| Weight D5 (g) | N              | 4                   | 4                   | 4                   | 4                   |
|               | NMiss          | 4                   | 4                   | 4                   | 4                   |
|               | Mean (SD)      | 148.8 (±19.0)       | 154.2 (±18.4)       | 144.0 (±18.1)       | 158.9 (±14.3)       |
|               | Min;Max        | 121.7;166.0         | 129.2;173.3         | 119.1;162.5         | 138.9;171.6         |
|               | Median [Q1;Q3] | 153.7 [136.7;160.9] | 157.2 [142.6;165.9] | 147.1 [132.8;155.2] | 162.5 [148.9;168.9] |
| Weight D6 (g) | N              | 4                   | 4                   | 4                   | 4                   |
|               | NMiss          | 4                   | 4                   | 4                   | 4                   |
|               | Mean (SD)      | 147.7 (±21.7)       | 154.0 (±19.0)       | 143.2 (±17.7)       | 158.3 (±15.6)       |
|               | Min;Max        | 116.7;167.1         | 127.4;172.3         | 118.2;160.0         | 137.9;175.4         |
|               | Median [Q1;Q3] | 153.4 [134.1;161.2] | 158.2 [141.9;166.1] | 147.3 [132.2;154.2] | 160.0 [147.5;169.1] |
| Weight D7 (g) | N              | 4                   | 4                   | 4                   | 4                   |
|               | NMiss          | 4                   | 4                   | 4                   | 4                   |
|               | Mean (SD)      | 146.6 (±19.1)       | 154.3 (±19.4)       | 142.4 (±16.8)       | 159.4 (±16.1)       |
|               | Min;Max        | 119.3;163.8         | 126.7;171.3         | 118.7;158.2         | 139.3;178.3         |
|               | Median [Q1;Q3] | 151.6 [134.9;158.3] | 159.6 [141.5;167.1] | 146.4 [131.7;153.2] | 160.0 [148.4;170.4] |

176 **Supplementary Table 5. Hamster challenge data (Control groups). Descriptive weight data**  
 177 **analysis during 7 DPI observation**

|                | Sham                | Naive               |
|----------------|---------------------|---------------------|
| Weight D0 (g)  |                     |                     |
| N              | 8                   | 8                   |
| NMiss          | 0                   | 0                   |
| Mean (SD)      | 149.2 ( $\pm$ 14.3) | 146.6 ( $\pm$ 14.8) |
| Min;Max        | 129.3;167.6         | 119.6;170.7         |
| Median [Q1;Q3] | 152.7 [135.5;160.1] | 147.1 [140.6;153.4] |
| Weight D1 (g)  |                     |                     |
| N              | 8                   | 8                   |
| NMiss          | 0                   | 0                   |
| Mean (SD)      | 150.2 ( $\pm$ 14.2) | 146.2 ( $\pm$ 13.0) |
| Min;Max        | 130.0;168.3         | 123.3;165.8         |
| Median [Q1;Q3] | 152.8 [136.9;162.0] | 147.2 [139.1;153.8] |
| Weight D2 (g)  |                     |                     |
| N              | 8                   | 8                   |
| NMiss          | 0                   | 0                   |
| Mean (SD)      | 145.2 ( $\pm$ 13.9) | 147.4 ( $\pm$ 14.0) |
| Min;Max        | 124.9;162.2         | 123.7;170.5         |
| Median [Q1;Q3] | 148.4 [132.2;156.8] | 148.0 [140.4;154.2] |
| Weight D3 (g)  |                     |                     |
| N              | 8                   | 8                   |
| NMiss          | 0                   | 0                   |
| Mean (SD)      | 141.7 ( $\pm$ 14.9) | 148.3 ( $\pm$ 13.0) |
| Min;Max        | 121.6;162.4         | 125.2;167.0         |
| Median [Q1;Q3] | 144.2 [127.2;153.5] | 150.4 [141.1;155.7] |
| Weight D4 (g)  |                     |                     |
| N              | 8                   | 8                   |
| NMiss          | 0                   | 0                   |
| Mean (SD)      | 137.8 ( $\pm$ 14.9) | 149.2 ( $\pm$ 13.3) |
| Min;Max        | 117.9;159.5         | 125.5;167.2         |
| Median [Q1;Q3] | 140.5 [123.3;148.8] | 151.5 [142.1;157.1] |
| Weight D5 (g)  |                     |                     |
| N              | 4                   | 4                   |
| NMiss          | 4                   | 4                   |
| Mean (SD)      | 137.1 ( $\pm$ 12.6) | 145.2 ( $\pm$ 13.2) |
| Min;Max        | 118.6;146.9         | 125.6;153.2         |
| Median [Q1;Q3] | 141.5 [129.4;144.9] | 151.1 [137.7;152.8] |
| Weight D6 (g)  |                     |                     |
| N              | 4                   | 4                   |
| NMiss          | 4                   | 4                   |
| Mean (SD)      | 134.1 ( $\pm$ 12.2) | 144.4 ( $\pm$ 13.6) |
| Min;Max        | 116.3;143.3         | 124.2;152.8         |
| Median [Q1;Q3] | 138.5 [126.5;141.8] | 150.3 [136.4;152.5] |
| Weight D7 (g)  |                     |                     |
| N              | 4                   | 4                   |
| NMiss          | 4                   | 4                   |
| Mean (SD)      | 132.2 ( $\pm$ 12.4) | 143.6 ( $\pm$ 12.3) |
| Min;Max        | 114.2;142.3         | 125.8;152.1         |
| Median [Q1;Q3] | 136.1 [124.5;139.9] | 148.3 [135.4;151.9] |

178

179



180 **Supplementary Table 6. Hamster challenge data (1 dose regimen). % weight loss during 7**  
 181 **DPI observation**

|                    |                     | 1<br>Group        |                  |                  |                   |
|--------------------|---------------------|-------------------|------------------|------------------|-------------------|
|                    |                     | MRT5500 (0.15 µg) | MRT5500 (1.5 µg) | MRT5500 (4.5 µg) | MRT5500 (13.5 µg) |
| % Weight Loss (D1) |                     |                   |                  |                  |                   |
| N                  | 8                   | 8                 | 8                | 8                | 8                 |
| NMiss              | 0                   | 0                 | 0                | 0                | 0                 |
| Mean (SD)          | -1.1 (±0.9)         | -2.0 (±0.6)       | -1.4 (±0.4)      | -1.4 (±0.5)      |                   |
| Min;Max            | -2.1;0.8            | -3.1;-1.1         | -1.9;-0.9        | -2.5;-0.9        |                   |
| Median [Q1;Q3]     | -1.2 [-1.6;-0.8]    | -2.1 [-2.2;-1.7]  | -1.5 [-1.7;-1.2] | -1.4 [-1.6;-1.0] |                   |
| % Weight Loss (D2) |                     |                   |                  |                  |                   |
| N                  | 8                   | 8                 | 8                | 8                | 8                 |
| NMiss              | 0                   | 0                 | 0                | 0                | 0                 |
| Mean (SD)          | -3.4 (±1.0)         | -4.0 (±0.7)       | -2.4 (±0.7)      | -2.7 (±1.1)      |                   |
| Min;Max            | -4.9;-1.6           | -5.1;-2.8         | -3.3;-1.1        | -3.7;-0.4        |                   |
| Median [Q1;Q3]     | -3.4 [-4.2;-2.9]    | -4.1 [-4.3;-3.6]  | -2.2 [-3.2;-2.0] | -2.9 [-3.6;-2.1] |                   |
| % Weight Loss (D3) |                     |                   |                  |                  |                   |
| N                  | 8                   | 8                 | 8                | 8                | 8                 |
| NMiss              | 0                   | 0                 | 0                | 0                | 0                 |
| Mean (SD)          | -8.0 (±1.5)         | -4.1 (±1.1)       | -2.9 (±1.3)      | -2.4 (±1.7)      |                   |
| Min;Max            | -10.4;-5.5          | -5.6;-2.1         | -4.6;-1.1        | -5.5;-0.7        |                   |
| Median [Q1;Q3]     | -7.7 [-9.0;-7.3]    | -4.4 [-4.7;-3.5]  | -2.9 [-4.0;-1.8] | -2.1 [-3.3;-0.9] |                   |
| % Weight Loss (D4) |                     |                   |                  |                  |                   |
| N                  | 8                   | 8                 | 8                | 8                | 8                 |
| NMiss              | 0                   | 0                 | 0                | 0                | 0                 |
| Mean (SD)          | -10.4 (±1.8)        | -3.3 (±1.1)       | -1.1 (±1.3)      | -1.5 (±1.6)      |                   |
| Min;Max            | -13.3;-7.0          | -4.7;-1.8         | -3.0;1.0         | -3.9;0.4         |                   |
| Median [Q1;Q3]     | -10.7 [-11.2;-9.7]  | -3.3 [-4.4;-2.3]  | -1.2 [-1.9;-0.2] | -1.5 [-2.7;-0.0] |                   |
| % Weight Loss (D5) |                     |                   |                  |                  |                   |
| N                  | 4                   | 4                 | 4                | 4                | 4                 |
| NMiss              | 4                   | 4                 | 4                | 4                | 4                 |
| Mean (SD)          | -13.5 (±1.0)        | -3.9 (±1.3)       | -2.9 (±1.3)      | -1.9 (±1.9)      |                   |
| Min;Max            | -15.1;-12.8         | -5.2;-2.3         | -4.4;-1.7        | -3.0;0.9         |                   |
| Median [Q1;Q3]     | -13.1 [-14.1;-12.9] | -4.0 [-5.0;-2.8]  | -2.9 [-4.0;-1.8] | -2.8 [-3.0;-0.8] |                   |
| % Weight Loss (D6) |                     |                   |                  |                  |                   |
| N                  | 4                   | 4                 | 4                | 4                | 4                 |
| NMiss              | 4                   | 4                 | 4                | 4                | 4                 |
| Mean (SD)          | -15.9 (±0.9)        | -3.5 (±1.0)       | -2.3 (±1.2)      | -1.2 (±2.0)      |                   |
| Min;Max            | -16.8;-14.7         | -4.8;-2.4         | -3.2;-0.6        | -2.8;1.8         |                   |
| Median [Q1;Q3]     | -16.0 [-16.4;-15.3] | -3.4 [-4.2;-2.8]  | -2.7 [-3.0;-1.6] | -1.8 [-2.3;-0.0] |                   |
| % Weight Loss (D7) |                     |                   |                  |                  |                   |
| N                  | 4                   | 4                 | 4                | 3                | 3                 |
| NMiss              | 4                   | 4                 | 4                | 5                | 5                 |
| Mean (SD)          | -15.3 (±1.7)        | -3.8 (±1.1)       | -2.5 (±0.9)      | -1.0 (±1.7)      |                   |
| Min;Max            | -17.6;-13.4         | -4.9;-2.4         | -3.7;-1.7        | -2.4;0.8         |                   |
| Median [Q1;Q3]     | -15.2 [-16.5;-14.2] | -3.8 [-4.6;-2.9]  | -2.4 [-3.3;-1.8] | -1.5 [-2.4;0.8]  |                   |

182

183

184

185 **Supplementary Table 7. Hamster challenge data (2 dose regimen). % weight loss during 7**

186 **DPI observation**

|                           |  | 2<br>Group        |                  |                  |                   |
|---------------------------|--|-------------------|------------------|------------------|-------------------|
|                           |  | MRT5500 (0.15 µg) | MRT5500 (1.5 µg) | MRT5500 (4.5 µg) | MRT5500 (13.5 µg) |
| <b>% Weight Loss (D1)</b> |  |                   |                  |                  |                   |
| N                         |  | 8                 | 8                | 8                | 8                 |
| NMiss                     |  | 0                 | 0                | 0                | 0                 |
| Mean (SD)                 |  | 0.1 (±2.1)        | -1.2 (±1.7)      | -0.5 (±1.1)      | -0.4 (±2.0)       |
| Min;Max                   |  | -2.4;4.6          | -4.1;1.6         | -1.7;1.4         | -4.6;1.7          |
| Median [Q1;Q3]            |  | -0.1 [-1.0;0.5]   | -1.3 [-2.1;-0.2] | -0.6 [-1.3;0.2]  | -0.0 [-1.0;1.0]   |
| <b>% Weight Loss (D2)</b> |  |                   |                  |                  |                   |
| N                         |  | 8                 | 8                | 8                | 8                 |
| NMiss                     |  | 0                 | 0                | 0                | 0                 |
| Mean (SD)                 |  | -1.7 (±2.3)       | -2.0 (±2.7)      | -2.3 (±1.5)      | -2.5 (±2.9)       |
| Min;Max                   |  | -4.5;2.5          | -5.6;2.6         | -4.3;0.2         | -8.5;1.4          |
| Median [Q1;Q3]            |  | -1.8 [-3.4;-0.5]  | -1.7 [-4.2;-0.6] | -2.5 [-3.5;-1.2] | -2.1 [-3.6;-0.9]  |
| <b>% Weight Loss (D3)</b> |  |                   |                  |                  |                   |
| N                         |  | 8                 | 8                | 8                | 8                 |
| NMiss                     |  | 0                 | 0                | 0                | 0                 |
| Mean (SD)                 |  | -2.4 (±2.3)       | -1.6 (±2.5)      | -1.9 (±1.6)      | -1.9 (±3.7)       |
| Min;Max                   |  | -5.4;1.5          | -4.3;3.1         | -4.5;0.1         | -9.4;2.8          |
| Median [Q1;Q3]            |  | -2.3 [-4.3;-1.3]  | -2.3 [-3.1;-0.5] | -1.8 [-3.2;-0.5] | -1.3 [-2.9;0.0]   |
| <b>% Weight Loss (D4)</b> |  |                   |                  |                  |                   |
| N                         |  | 8                 | 8                | 8                | 8                 |
| NMiss                     |  | 0                 | 0                | 0                | 0                 |
| Mean (SD)                 |  | -1.5 (±3.3)       | -0.3 (±2.1)      | -0.5 (±1.6)      | -1.0 (±3.3)       |
| Min;Max                   |  | -6.2;2.2          | -3.0;3.2         | -3.3;1.2         | -7.9;3.4          |
| Median [Q1;Q3]            |  | -0.9 [-4.3;1.3]   | -0.6 [-1.8;1.2]  | -0.2 [-1.5;0.7]  | -0.2 [-1.9;0.5]   |
| <b>% Weight Loss (D5)</b> |  |                   |                  |                  |                   |
| N                         |  | 4                 | 4                | 4                | 4                 |
| NMiss                     |  | 4                 | 4                | 4                | 4                 |
| Mean (SD)                 |  | -1.3 (±4.7)       | 0.8 (±3.2)       | -0.1 (±1.8)      | 0.3 (±2.5)        |
| Min;Max                   |  | -7.6;3.0          | -2.0;5.5         | -2.0;2.4         | -3.1;2.1          |
| Median [Q1;Q3]            |  | -0.2 [-4.8;2.2]   | -0.1 [-1.1;2.7]  | -0.3 [-1.2;1.1]  | 1.1 [-1.5;2.1]    |
| <b>% Weight Loss (D6)</b> |  |                   |                  |                  |                   |
| N                         |  | 4                 | 4                | 4                | 4                 |
| NMiss                     |  | 4                 | 4                | 4                | 4                 |
| Mean (SD)                 |  | -2.1 (±6.4)       | 0.7 (±3.8)       | -0.6 (±2.4)      | -0.1 (±3.4)       |
| Min;Max                   |  | -11.4;2.9         | -3.3;5.8         | -2.7;2.8         | -3.8;4.4          |
| Median [Q1;Q3]            |  | -0.0 [-6.3;2.0]   | 0.1 [-2.0;3.3]   | -1.2 [-2.4;1.2]  | -0.4 [-2.4;2.2]   |
| <b>% Weight Loss (D7)</b> |  |                   |                  |                  |                   |
| N                         |  | 4                 | 4                | 4                | 4                 |
| NMiss                     |  | 4                 | 4                | 4                | 4                 |
| Mean (SD)                 |  | -2.7 (±5.0)       | 0.8 (±4.2)       | -1.1 (±2.5)      | 0.6 (±3.9)        |
| Min;Max                   |  | -9.4;2.2          | -3.9;5.8         | -3.1;2.6         | -2.9;6.1          |
| Median [Q1;Q3]            |  | -1.9 [-6.3;0.9]   | 0.7 [-2.5;4.2]   | -1.9 [-2.7;0.6]  | -0.4 [-1.8;3.0]   |

188 **Supplementary Table 8. Hamster challenge data (Control groups). % weight loss during 7**

189 **DPI observation**

|                    | Sham                | Naive              |
|--------------------|---------------------|--------------------|
| % Weight Loss (D1) |                     |                    |
| N                  | 8                   | 8                  |
| NMiss              | 0                   | 0                  |
| Mean (SD)          | 0.7 ( $\pm 2.1$ )   | -0.1 ( $\pm 1.7$ ) |
| Min;Max            | -1.5;5.3            | -2.9;3.1           |
| Median [Q1;Q3]     | 0.5 [-0.6;1.0]      | 0.1 [-1.1;0.3]     |
| % Weight Loss (D2) |                     |                    |
| N                  | 8                   | 8                  |
| NMiss              | 0                   | 0                  |
| Mean (SD)          | -2.6 ( $\pm 2.2$ )  | 0.7 ( $\pm 1.5$ )  |
| Min;Max            | -5.1;2.3            | -1.6;3.4           |
| Median [Q1;Q3]     | -3.1 [-3.7;-2.5]    | 0.5 [-0.1;1.3]     |
| % Weight Loss (D3) |                     |                    |
| N                  | 8                   | 8                  |
| NMiss              | 0                   | 0                  |
| Mean (SD)          | -5.1 ( $\pm 2.4$ )  | 1.7 ( $\pm 10.1$ ) |
| Min;Max            | -7.4;-0.2           | -11.5;13.8         |
| Median [Q1;Q3]     | -6.0 [-6.5;-4.0]    | 2.7 [-7.6;10.7]    |
| % Weight Loss (D4) |                     |                    |
| N                  | 8                   | 8                  |
| NMiss              | 0                   | 0                  |
| Mean (SD)          | -7.7 ( $\pm 2.4$ )  | 2.4 ( $\pm 10.1$ ) |
| Min;Max            | -10.4;-3.5          | -10.8;14.1         |
| Median [Q1;Q3]     | -8.9 [-9.1;-5.8]    | 2.7 [-6.8;11.9]    |
| % Weight Loss (D5) |                     |                    |
| N                  | 4                   | 4                  |
| NMiss              | 4                   | 4                  |
| Mean (SD)          | -9.0 ( $\pm 1.9$ )  | 4.4 ( $\pm 0.8$ )  |
| Min;Max            | -10.6;-7.2          | 3.3;5.0            |
| Median [Q1;Q3]     | -9.0 [-10.6;-7.3]   | 4.7 [3.9;5.0]      |
| % Weight Loss (D6) |                     |                    |
| N                  | 4                   | 4                  |
| NMiss              | 4                   | 4                  |
| Mean (SD)          | -10.9 ( $\pm 1.9$ ) | 3.8 ( $\pm 0.4$ )  |
| Min;Max            | -12.8;-8.9          | 3.2;4.2            |
| Median [Q1;Q3]     | -11.0 [-12.5;-9.3]  | 4.0 [3.5;4.1]      |
| % Weight Loss (D7) |                     |                    |
| N                  | 4                   | 4                  |
| NMiss              | 4                   | 4                  |
| Mean (SD)          | -12.2 ( $\pm 2.1$ ) | 3.3 ( $\pm 1.5$ )  |
| Min;Max            | -13.9;-9.2          | 1.5;5.2            |
| Median [Q1;Q3]     | -12.9 [-13.6;-10.8] | 3.3 [2.2;4.4]      |

190

191

192

193 **Supplementary Table 9. Pairwise comparisons of PsVNa titers on D35 in NHPs (5 µg dose,**  
 194 **see also Fig.2)**

| Group pairs                         | p-value (Wilcoxon Exact Rank Test) |
|-------------------------------------|------------------------------------|
| <b>2P/GSAS vs 2P</b>                | <b>0.3143**</b>                    |
| <b>2P/GSAS vs GSAS</b>              | <b>0.4857</b>                      |
| <b>2P/GSAS vs 2P/GSAS/ALAYT</b>     | <b>0.4857</b>                      |
| <b>2P/GSAS vs 6P</b>                | <b>0.0286</b>                      |
| <b>2P/GSAS vs 6P/GSAS</b>           | <b>0.1143</b>                      |
| <b>2P/GSAS vs Convalescent Sera</b> | <b>0.0105*</b>                     |

\* For comparison versus Convalescent Sera, Wilcoxon Rank Test was used (not the exact test)

\*\* Two animals out of four in 2P group demonstrated PsVNa titers below lower limit of detection (see Fig.2)

195  
196  
197

198 **Supplementary Table 10. sgmRNA copies in lungs and nares of MRT5500 vaccinated**  
 199 **hamsters as compared to Sham (diluent) group (4 and 7 DPI)**

**4 DPI**

| Dose number                  | 1 dose             |                    |                      |                    | 2 doses            |                    |                    |                    |
|------------------------------|--------------------|--------------------|----------------------|--------------------|--------------------|--------------------|--------------------|--------------------|
|                              | 0.15 µg            | 1.5 µg             | 4.5 µg               | 13.5 µg            | 0.15 µg            | 1.5 µg             | 4.5 µg             | 13.5 µg            |
| sgRNA copies in <b>Lungs</b> | > Sham<br>p=0.0286 | > Sham<br>p=0.4857 | = Sham<br>p=1        | < Sham<br>p=0.0286 | < Sham<br>p=0.0571 | < Sham<br>p=0.0286 | < Sham<br>p=0.0286 | < Sham<br>p=0.0286 |
| sgRNA copies in <b>Nares</b> | > Sham<br>p=0.0571 | < Sham<br>p=0.8857 | > Sham -<br>p=0.1143 | = Sham<br>p=1      | < Sham<br>p=0.8857 | < Sham<br>p=0.4    | < Sham<br>p=0.4857 | < Sham<br>p=0.5429 |

**7 DPI**

| Dose number                  | 1 dose             |                      |                      |                    | 2 doses            |                    |                    |                    |
|------------------------------|--------------------|----------------------|----------------------|--------------------|--------------------|--------------------|--------------------|--------------------|
|                              | 0.15 µg            | 1.5 µg               | 4.5 µg               | 13.5 µg            | 0.15 µg            | 1.5 µg             | 4.5 µg             | 13.5 µg            |
| sgRNA copies in <b>Lungs</b> | > Sham<br>p=0.1429 | < Sham<br>p=0.1429   | < Sham -<br>p=0.1429 | < Sham<br>p=0.1429 | < Sham<br>p=0.2571 | < Sham<br>p=0.1429 | < Sham<br>p=0.1429 | < Sham<br>p=0.1429 |
| sgRNA copies in <b>Nares</b> | < Sham<br>p=0.8857 | < Sham -<br>p=0.1143 | < Sham -<br>p=0.0571 | < Sham<br>p=0.0286 | < Sham<br>p=0.0286 | < Sham<br>p=0.3143 | < Sham<br>p=0.6    | < Sham<br>p=0.0286 |

- Tables represent the results of Wilcoxon Exact Test comparisons against Sham regarding sgRNA copies in Lung and Nares.
- “=” (equal), <’ (less then) or >’ (more then) signs represent the directions of the difference as compared to Sham group
- DPI – days post infection (challenge) with SARS-CoV-2

200  
201  
202

203 **Supplementary Table 11: List of acronyms**

|     |                    |                                                                           |
|-----|--------------------|---------------------------------------------------------------------------|
| 204 | mRNA               | messenger RNA                                                             |
| 205 | LNP                | Lipid Nanoparticles                                                       |
| 206 | MRT5500            | mRNA/LNP vaccine formulation                                              |
| 207 | COVID-19           | Coronavirus disease 2019                                                  |
| 208 | 2019-nCoV          | The 2019-novel coronavirus                                                |
| 209 | SARS               | Severe Acute Respiratory Syndrome                                         |
| 210 | MERS-CoV           | Coronavirus causing Middle East Respiratory Syndrome                      |
| 211 | HCoV-HKU1          | Human coronavirus HKU1                                                    |
| 212 | SARS-CoV-2         | Severe Acute Respiratory Syndrome Coronavirus 2, virus causing            |
| 213 |                    | COVID-19                                                                  |
| 214 | S-protein or S     | Structural Spike glycoprotein of SARS-CoV-2                               |
| 215 | S-GCN4 protein     | Recombinant S-protein containing a fusion of S-ectodomain with artificial |
| 216 |                    | trimerization domain GCN4 (custom made in GeneArt)                        |
| 217 | E-, M-, N-proteins | Proteins E, M, N of SARS-CoV-2                                            |
| 218 | S1, S2             | S1 and S2 subunits of S-protein                                           |
| 219 | RBD                | Receptor Binding Domain of S-protein                                      |
| 220 | ACE2               | Angiotensin-Converting Enzyme 2, cellular receptor of SARS CoV-1, 2       |
| 221 | WT S-protein       | Wild Type full length S-protein of SARS-CoV-2                             |
| 222 | 2P S-protein       | Pre-fusion stabilized mutant of full length S-protein of SARS-CoV-2       |
| 223 | GSAS S-protein     | Furin cleavage-site mutant of full length S-protein of SARS-CoV-2         |
| 224 | 2P/GSAS            | S-protein double mutant containing 2P and GSAS                            |
| 225 | nAb                | Neutralizing Antibodies                                                   |
| 226 | mAb                | Monoclonal Antibodies                                                     |
| 227 | HEK293             | Immortalized Human Embryonic Kidney 293 cells                             |
| 228 | HEK293T            | The cell line, derived from the HEK293 cell line, that expresses          |
| 229 |                    | a mutant version of the SV40 large T antigen                              |
| 230 | HeLa               | Immortalized Human cervical cell line                                     |
| 231 | kDa                | kilo-Daltons, unit of protein mass                                        |

|     |                                    |                                                                  |
|-----|------------------------------------|------------------------------------------------------------------|
| 232 | ER                                 | Endoplasmic Reticulum                                            |
| 233 | KDEL                               | Molecular marker of ER                                           |
| 234 | ERGIC                              | Endoplasmic Reticulum–Golgi Intermediate Compartment             |
| 235 | KLHYT                              | Intracellular ER retention signal of S—proteins of SARS-CoV-1, 2 |
| 236 | BALB/c                             | Albino Laboratory-Bred/c strain of mice                          |
| 237 | ELISA                              | Enzyme-Linked Immunosorbent Assay                                |
| 238 | MN                                 | Microneutralization                                              |
| 239 | IgG                                | Immunoglobulin G                                                 |
| 240 | IgA                                | Immunoglobulin A                                                 |
| 241 | GMT                                | Geometric Mean Titers                                            |
| 242 | GFP                                | Green Fluorescence Protein                                       |
| 243 | RVP                                | GFP Reporter pseudoViral Particles                               |
| 244 | PsVNa                              | Pseudoviral neutralization assay                                 |
| 245 | ID <sub>50</sub>                   | Serum dilution providing 50% inhibition of RVP or WT SARS-CoV-2  |
| 246 |                                    | entry                                                            |
| 247 | NHP                                | Non-Human Primate                                                |
| 248 | PsV                                | Pseudovirus, pseudoviral                                         |
| 249 | VAERD                              | Vaccine Associated Enhanced Respiratory Disease                  |
| 250 | RSV                                | Respiratory Syncytial Virus                                      |
| 251 | RSV F protein                      | Major structural protein F of RSV                                |
| 252 | T <sub>H</sub> 1, T <sub>H</sub> 2 | T-helper cells type 1 and 2                                      |
| 253 | IFN- $\gamma$                      | Interferon gamma                                                 |
| 254 | IL-13                              | Interleukin 13                                                   |
| 255 | IL-5                               | Interleukin 5                                                    |
| 256 | rhIL-2                             | recombinant human Interleukin 2 (IL-2)                           |
| 257 | PBMC                               | Peripheral Blood Mononuclear Cell                                |
| 258 | ELISPOT                            | Enzyme-Linked Immune Absorbent Spot assay                        |
| 259 | RPMI 1640                          | The growth medium used in cell culture                           |

|     |                           |                                                                             |
|-----|---------------------------|-----------------------------------------------------------------------------|
| 260 | Cap 1                     | Specially altered nucleotide on the 5' end of some primary transcripts such |
| 261 |                           | as precursor messenger RNA                                                  |
| 262 | Poly(A) tail              | A stretch of multiple adenosine monophosphates at 3' end of some            |
| 263 |                           | primary transcripts such as precursor messenger RNA                         |
| 264 | PBS                       | Phosphate Buffer                                                            |
| 265 | Triton X-100              | Nonionic surfactant used for permeabilization of HeLa cells                 |
| 266 | IACUC                     | Institutional Animal Care and Use Committee                                 |
| 267 | D                         | Day                                                                         |
| 268 | IM                        | Intramuscular                                                               |
| 269 | TCID <sub>50</sub>        | 50% Tissue Culture Infectious Dose                                          |
| 270 | MN ID <sub>50</sub> Titer | OD of 50% neutralization point - intercept)/slope                           |
| 271 | CovA                      | Concanavalin A                                                              |
| 272 | OD                        | Optical Density                                                             |
| 273 | CTL                       | Contact Laboratory Services                                                 |
| 274 | SFC                       | Spot Forming Cells                                                          |
| 275 | h                         | h                                                                           |
| 276 | µg                        | Microgram                                                                   |
| 277 | ng                        | Nanogram                                                                    |
| 278 | µl                        | Microliter                                                                  |
| 279 | mL                        | Milliliter                                                                  |
